# Supplementary figures and images for: Shortwave infrared imaging setup to study entrained air bubble dynamics in a MEMS-based piezo-acoustic inkjet printhead
Source: Springer Nature journal article supplement (doi:10.1007/s00348-019-2772-8), 2019-07-11

Van der Bos et al. (2011)

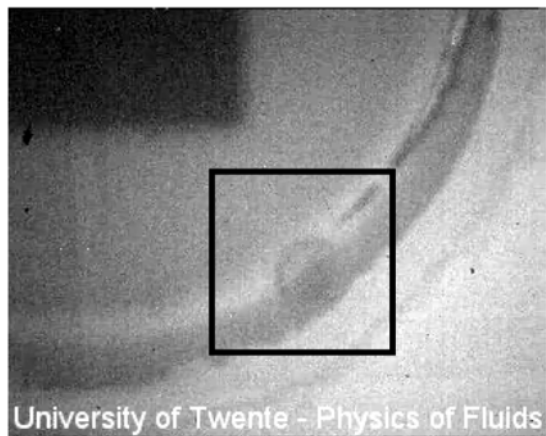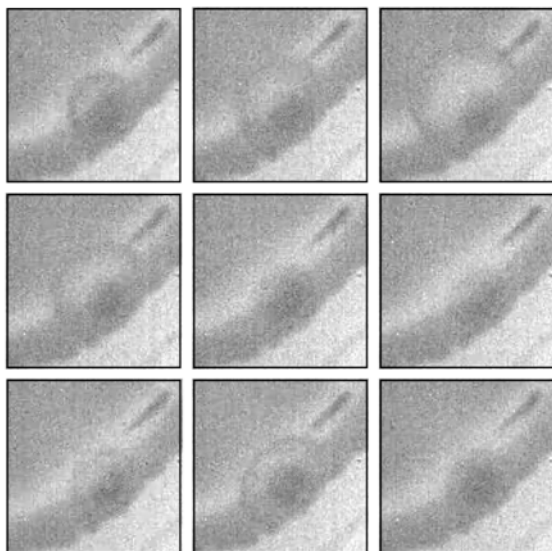

Current work

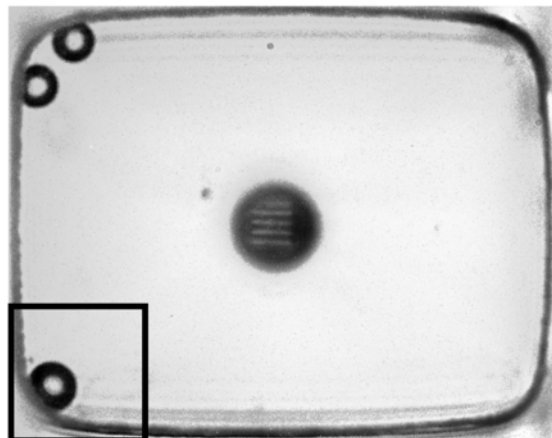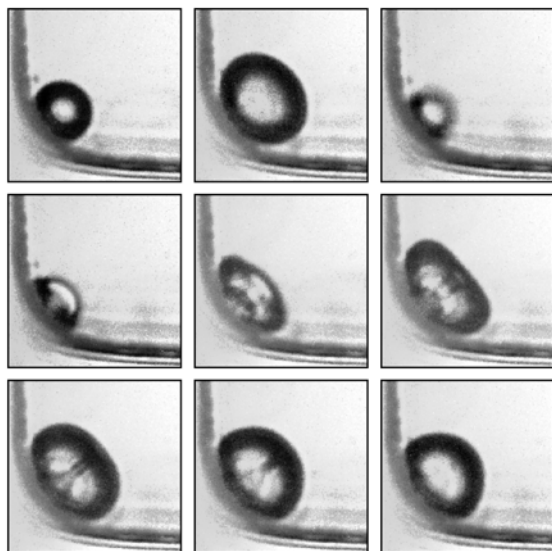

Supplement: MOESM1 [file 16921722]
